# Supplementary material
Source: PubMed Central journal article supplement (PMC4325138)
Supplement: AEM.03661-14_zam999116067so1.pdf [file AEM.03661-14_zam999116067so1.pdf]

The files included as Supplementary material help to understand the text BAPS and correlation analysis made of *E. faecium* and *E. faecalis* population structure analysis

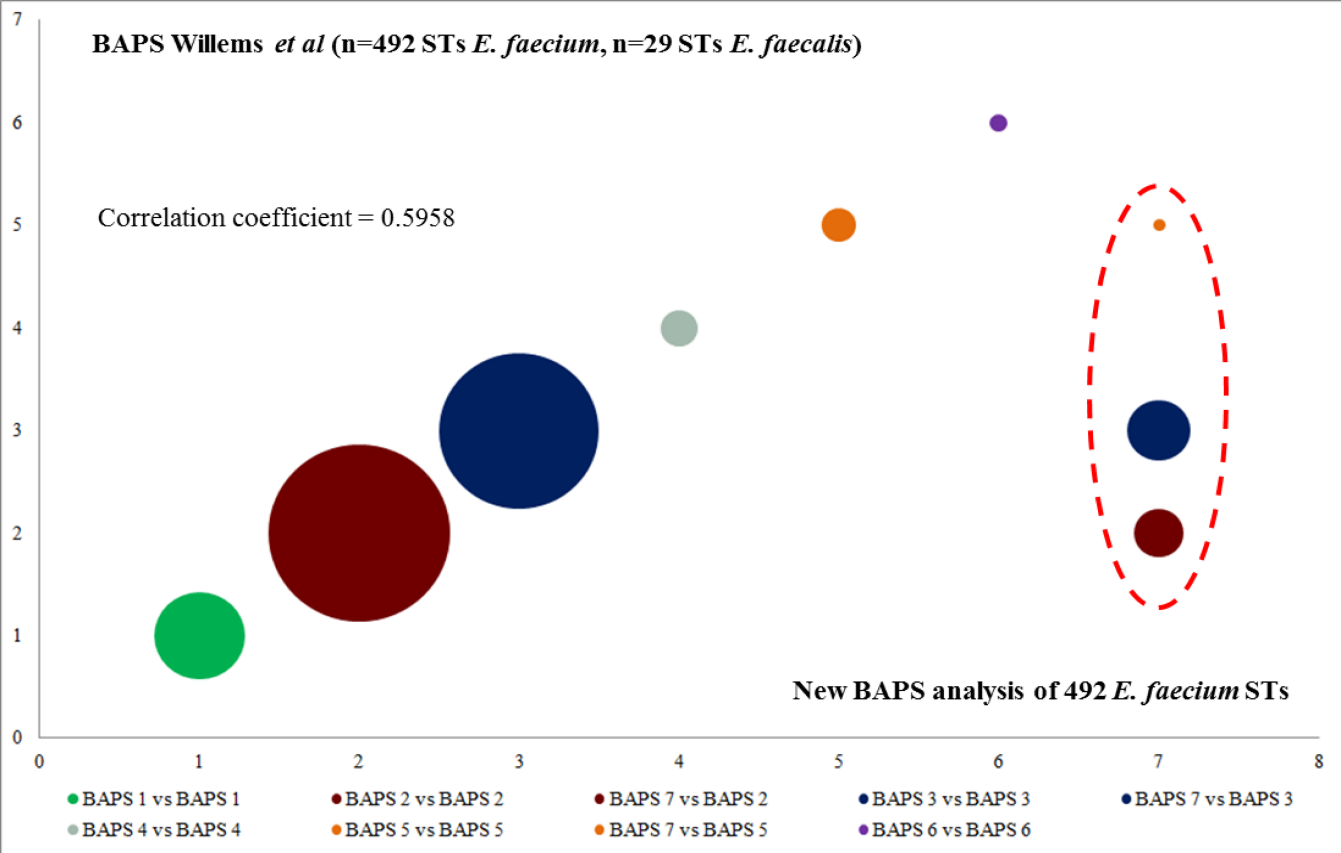

**Figure S1. Correlation between the *E. faecium* BAPS groups obtained by Willems *et al* (Willems RJL, Top J, van Schaik W, Leavis H, Bonten M, Sirén J, Hanage WP, Corander J. 2012. Restricted gene flow among hospital subpopulations of *Enterococcus faecium*. MBio 3:e00151–12) using a MLST dataset of 492 *E. faecium* STs plus 29 *E. faecalis* (Y) and those obtained by us when using the same 492 *E. faecium* STs but excluding *E. faecalis* STs (X). The size of each circle represents the population size included in each group. Dotted red line, groups with no correlation.**

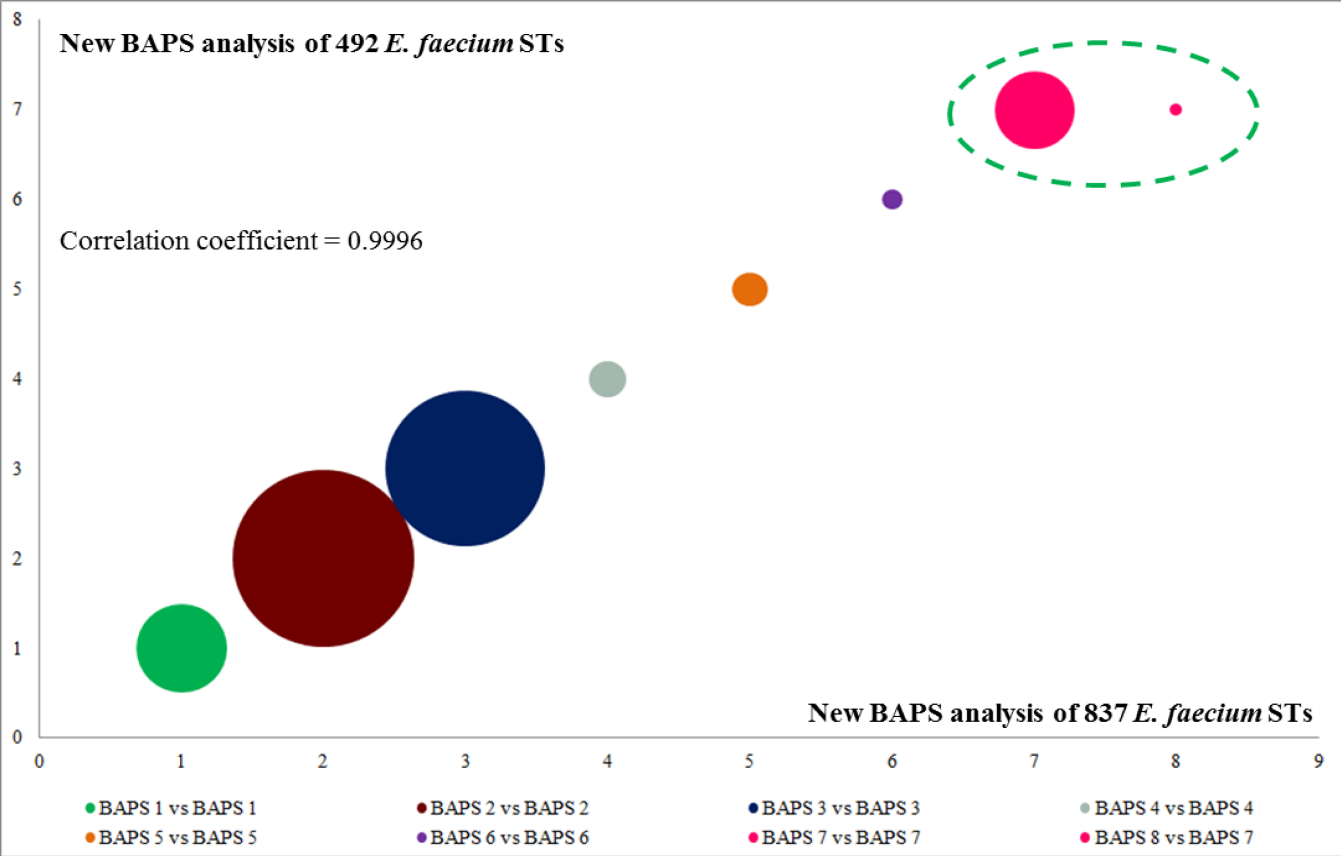

**Figure S2. Correlation between the *E. faecium* BAPS groups obtained using the *E. faecium* dataset (492 STs) (Y) or using an updated database (837 STs) (X). The size of each circle represents the population size included in each group. Green line, groups that change with the increase in size of the population analyzed (Willems RJL, Top J, van Schaik W, Leavis H, Bonten M, Sirén J, Hanage WP, Corander J. 2012.**

Restricted gene flow among hospital subpopulations of *Enterococcus faecium*. MBio 3:e00151–12).

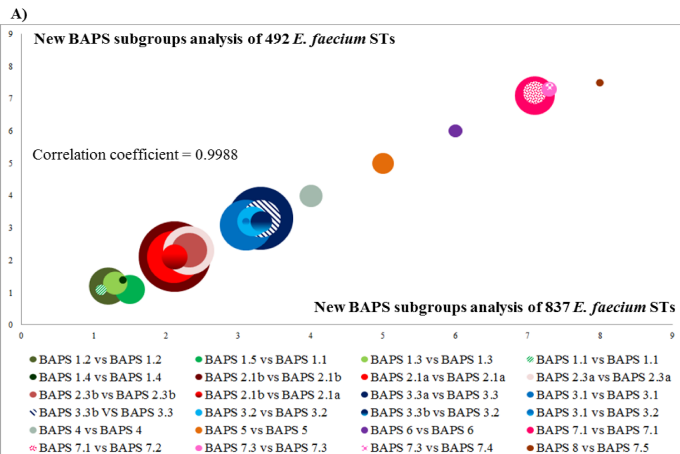

**Figure S3.** A) Correlation between the *E. faecium* BAPS subgroups obtained using the original *E. faecium* dataset analyzed in previous publications (492 STs) (Y) or using an updated database (837 STs) (X). The size of each circle represents the population size included in each group. The size of each circle represents the population size included in each group. B) Table showing correspondence between BAPS groups/subgroups described in Willems *et al* (Willems RJL, Top J, van Schaik W, Leavis H, Bonten M, Sirén J, Hanage WP, Corander J . 2012. Restricted gene flow among hospital subpopulations of *Enterococcus faecium*. MBio 3:e00151–12) and those described in this study.

B)

| BAPS Willems <i>et al</i> |              |               |               | New BAPS     |               |              |               |       |       |
|---------------------------|--------------|---------------|---------------|--------------|---------------|--------------|---------------|-------|-------|
| Group                     | Subgroup     | No STs        | %             | Group        | Subgroup      | No STs       | %             |       |       |
| BAPS 1                    | -            | 53            | 10.77%        | BAPS 1       | 1.1           | 2            | 0.41%         |       |       |
|                           |              |               |               |              | 1.2           | 25           | 5.08%         |       |       |
|                           |              |               |               |              | 1.3           | 10           | 2.03%         |       |       |
|                           |              |               |               |              | 1.4           | 1            | 0.20%         |       |       |
|                           |              |               |               |              | 1.5           | 15           | 3.05%         |       |       |
|                           |              |               |               |              | 1.6           | 0            | 0.00%         |       |       |
|                           |              |               |               |              | <b>Total</b>  | <b>53</b>    | <b>10.77%</b> |       |       |
|                           |              |               |               |              |               |              |               |       |       |
| BAPS 2                    | 2.1          | 149           | 30.28%        | BAPS 2       | 2.1a          | 49           | 9.96%         |       |       |
|                           |              |               |               |              | 2.1b          | 99           | 20.12%        |       |       |
|                           | 2.3          | 63            | 12.80%        |              | 2.3b          | 1            | 0.20%         |       |       |
|                           |              |               |               |              | 2.3a          | 43           | 8.74%         |       |       |
|                           |              |               |               |              | 2.3b          | 20           | 4.07%         |       |       |
|                           | 2.4          | 15            | 3.05%         |              | BAPS 7        | 7.1          | 15            | 3.05% |       |
|                           | 2.2          | 1             | 0.20%         |              | BAPS 8        |              | 1             | 0.20% |       |
|                           | <b>Total</b> | <b>228</b>    | <b>46.34%</b> |              | <b>Total</b>  | <b>228</b>   | <b>46.34%</b> |       |       |
|                           | BAPS 3       | 3.1           | 45            |              | 9.15%         | BAPS 3       | 3.1           | 45    | 9.15% |
|                           |              |               |               |              |               |              | 3.2           | 16    | 3.25% |
| 3.2                       |              | 17            | 3.46%         | 3.3b         | 1             |              | 0.20%         |       |       |
|                           |              |               |               | 3.3a         | 71            |              | 14.43%        |       |       |
| 3.3                       |              | 103           | 20.93%        | 3.3b         | 32            |              | 6.50%         |       |       |
|                           |              |               |               | BAPS 7       | 7.3           |              | 4             | 0.81% |       |
| 3.4                       | 4            | 0.81%         | 7.1           | 21           | 4.27%         |              |               |       |       |
| 3.5                       | 21           | 4.27%         | <b>Total</b>  | <b>190</b>   | <b>38.62%</b> |              |               |       |       |
| <b>Total</b>              | <b>190</b>   | <b>38.62%</b> |               |              |               |              |               |       |       |
| BAPS 4                    |              | 9             | 1.83%         | BAPS 4       |               | 9            | 1.83%         |       |       |
| BAPS 5                    |              | 9             | 1.83%         | BAPS 5       |               | 8            | 1.63%         |       |       |
|                           |              |               |               | BAPS 7       | 7.3           | 1            | 0.20%         |       |       |
|                           |              |               |               | <b>Total</b> | <b>9</b>      | <b>1.83%</b> |               |       |       |
| BAPS 6                    |              | 3             | 0.61%         | BAPS 6       |               | 3            | 0.61%         |       |       |
| <b>TOTAL</b>              |              | <b>492</b>    |               |              |               | <b>492</b>   |               |       |       |

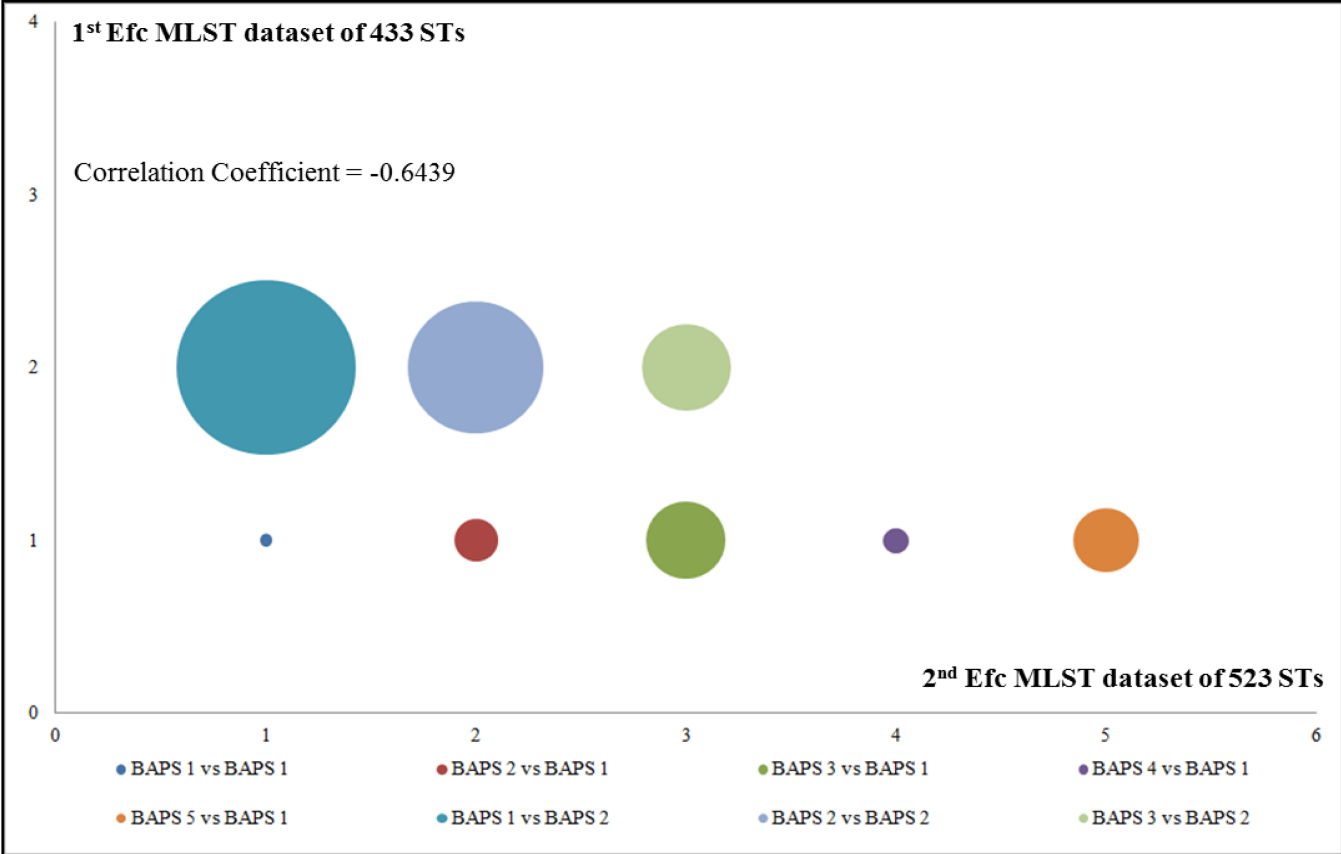

**Figure S4. Correlation between the *E. faecalis* BAPS subgroups obtained using the first dataset of 433 STs (Y) and the second dataset of 523 STs (X). The size of each circle represents the population size included in each group.**

**Table S1. *E. faecium* isolates epidemiological data.**

| BAPS   |               | ST        |                | PFGE-type (No)          | AREfm (No)        | Year      | Age Group (No) |    |     | Ward (No)                                                                     |                             | Origin (No)    | VF (No isolates) |                    |     |     |       | Antibiotic resistance (No isolates) |     |                  |                  |        |       |       |       |       |
|--------|---------------|-----------|----------------|-------------------------|-------------------|-----------|----------------|----|-----|-------------------------------------------------------------------------------|-----------------------------|----------------|------------------|--------------------|-----|-----|-------|-------------------------------------|-----|------------------|------------------|--------|-------|-------|-------|-------|
| Group  | Subgroup (No) | ST (No)*  | No PFGE        |                         |                   |           | I              | II | III | Name                                                                          | Type                        |                | esp              | hyl <sub>Efm</sub> | acm | ERY | VAN   | TEI                                 | CIP | LEV <sup>1</sup> | STR <sup>1</sup> | GEN    | TET   | CHL   |       |       |
| BAPS 1 | 1.1 (2)       | 39 (1)    | 1              | ASEfm57                 | -                 | 2009      | 1              |    |     | P                                                                             | M                           | H              | +                | -                  | +   | R   | S     | S                                   | R   | ND               | ND               | S      | S     | S     |       |       |
|        |               | 715 (1)   | 1              | ASEfm46                 | -                 | 2009      |                | 1  |     | ER                                                                            | O                           | NH             | -                | -                  | -   | R   | S     | S                                   | R   | ND               | ND               | S      | S     | S     |       |       |
|        | 1.2 (27)      | 94 (4)    | 4              | ASEfm11-14              | -                 | 2009-2010 |                | 3  | 1   | PHC                                                                           | O                           | NH             | +                | (2)                | -   | +   | (3)   | R                                   | S   | S                | S                | ND     | ND    | S     | R (1) | S     |
|        |               | 361 (3)   | 2 <sup>a</sup> | ASEfm30(2) - 31         | -                 | 2009      | 1              |    | 2   | ER; ID; PHC                                                                   | O (2); M                    | NH (2); H      | -                | -                  | -   | +   | R     | S                                   | S   | S                | ND               | ND     | S     | R (1) | S     |       |
|        |               | 178 (1)   | 1              | ASEfm23                 | -                 | 2009      | 1              |    |     | PHC                                                                           | O                           | NH             | +                | +                  | -   | +   | S     | S                                   | S   | S                | ND               | ND     | S     | S     | S     |       |
|        |               | 688 (1)   | 1              | ASEfm15                 | -                 | 2009      | 1              |    |     | PHC                                                                           | O                           | NH             | -                | -                  | -   | +   | R     | S                                   | S   | S                | ND               | ND     | S     | S     | S     |       |
|        |               | 691 (1)   | 1              | ASEfm19                 | -                 | 2009      |                | 1  |     | PHC                                                                           | O                           | NH             | +                | +                  | -   | +   | R     | S                                   | S   | S                | ND               | ND     | S     | S     | S     |       |
|        |               | 296 (2)   | 2 <sup>b</sup> | ASEfm 21, ASEfm63       | -                 | 2009      |                | 2  |     | NE; PHC                                                                       | O; M                        | NH; H          | +                | (1)                | -   | +   | (1)   | R                                   | S   | S                | S                | ND     | ND    | S     | S     | S     |
|        |               | 345 (1)   | 1              | ASEfm29                 | -                 | 2009      |                | 1  |     | PHC                                                                           | O                           | NH             | +                | +                  | -   | +   | R     | S                                   | S   | S                | ND               | ND     | S     | S     | S     |       |
|        |               | 695 (1)   | 1              | ASEfm22                 | -                 | 2009      | 1              |    |     | PHC                                                                           | O                           | NH             | -                | -                  | -   | +   | R     | S                                   | S   | S                | ND               | ND     | S     | R     | S     |       |
|        |               | 583 (2)   | 2 <sup>c</sup> | ASEfm44; ASEfm64        | -                 | 2009-2011 | 1              | 1  |     | PHC                                                                           | O                           | NH; H          | -                | -                  | -   | +   | (1)   | R                                   | S   | S                | S                | ND     | ND    | S     | S     | S     |
|        |               | 714 (1)   | 1 <sup>c</sup> | ASEfm44                 | -                 | 2009      |                | 1  |     | ER                                                                            | O                           | NH             | -                | -                  | -   | +   | R     | S                                   | S   | S                | ND               | ND     | S     | S     | S     |       |
|        |               | 696 (2)   | 1 <sup>d</sup> | ASEfm26                 | -                 | 2009      |                | 2  |     | PHC                                                                           | O                           | NH             | +                | (1)                | -   | +   | R     | S                                   | S   | S                | ND               | ND     | S     | S     | S     |       |
|        |               | 620 (1)   | 1              | ASEfm17                 | -                 | 2009      |                | 1  |     | PHC                                                                           | O                           | NH             | -                | -                  | -   | +   | R     | S                                   | S   | S                | ND               | ND     | S     | S     | S     |       |
|        |               | 76 (1)    | 1              | ASEfm10                 | -                 | 2010      | 1              |    |     | P                                                                             | O                           | NH             | +                | +                  | -   | +   | S     | S                                   | S   | S                | ND               | ND     | S     | S     | S     |       |
|        |               | 684 (1)   | 1              | ASEfm52                 | -                 | 2009      |                | 1  |     | PHC                                                                           | O                           | NH             | +                | +                  | -   | +   | R     | S                                   | S   | S                | ND               | ND     | S     | S     | S     |       |
|        |               | 685 (1)   | 1              | ASEfm9                  | -                 | 2009      |                | 1  |     | PHC                                                                           | O                           | NH             | -                | -                  | -   | -   | R     | S                                   | S   | S                | ND               | ND     | S     | S     | S     |       |
|        | 692 (1)       | 1         | ASEfm20        | -                       | 2011              | 1         |                |    | P   | M                                                                             | H                           | -              | -                | -                  | +   | R   | S     | S                                   | S   | ND               | ND               | S      | R     | S     |       |       |
|        | 693 (1)       | 1         | ASEfm65        | -                       | 2010              |           | 1              |    | PHC | O                                                                             | NH                          | +              | +                | -                  | +   | R   | S     | S                                   | S   | ND               | ND               | S      | S     | S     |       |       |
|        | 697 (1)       | 1         | ASEfm25        | -                       | 2010              |           | 1              |    | E   | O                                                                             | NH                          | -              | -                | -                  | +   | R   | S     | S                                   | S   | ND               | ND               | S      | S     | S     |       |       |
|        | 717 (1)       | 1         | ASEfm45        | -                       | 2010              |           | 1              |    | GDS | O                                                                             | NH                          | +              | +                | -                  | +   | R   | S     | S                                   | S   | ND               | ND               | S      | S     | S     |       |       |
|        | 1.5 (2)       | 623 (1)   | 1              | ASEfm24                 | -                 | 2009      |                | 1  |     | PHC                                                                           | O                           | NH             | +                | +                  | -   | +   | R     | S                                   | S   | S                | ND               | ND     | S     | S     | S     |       |
|        |               | 713 (1)   | 1              | ASEfm62                 | -                 | 2009      |                | 1  |     | PHC                                                                           | O                           | NH             | -                | -                  | -   | +   | S     | S                                   | S   | S                | ND               | ND     | S     | S     | S     |       |
|        | 1.6 (2)       | 686 (1)   | NT             | NT                      | -                 | 2009      | 1              |    |     | PHC                                                                           | O                           | NH             | +                | +                  | -   | +   | R     | S                                   | S   | S                | ND               | ND     | S     | S     | S     |       |
|        |               | 694 (1)   | 1 <sup>b</sup> | ASEfm63.1               | -                 | 2009      |                | 1  |     | ER                                                                            | O                           | NH             | -                | -                  | -   | +   | R     | S                                   | S   | R                | ND               | ND     | S     | S     | S     |       |
|        | BAPS 2        | 2.1a (33) | 117 (25/9)     | 1 <sup>e</sup>          | CEfm1             | +         | 2009-2010      | 8  | 17  | ID (3); IM (3); GDS (3); NP (3); T (3); G (2); UR (2); C; CV; ER; GI; NM; PHC | M (14); I (4); O (4); S (3) | H (21); NH (4) | +                | (22)               | +   | (2) | +     | R (23)                              | S   | S                | R (24)           | R (23) | R (6) | S     | S     | R (1) |
|        |               |           | 203 (4/3)      | 2 <sup>k</sup>          | CEfm7 (3); CEfm27 | +         | 2009-2010      | 1  | 3   | IM (2); NM; PS                                                                | M (3); S                    | H              | +                | (3)                | -   | +   | R (3) | S                                   | S   | R (3)            | R (3)            | R (3)  | S     | S     | R (1) |       |
|        |               | 80 (1/1)  | 1              | CEfm39                  | +                 | 2009      | 1              |    | ID  | O                                                                             | NH                          | -              | -                | -                  | +   | R   | S     | S                                   | R   | R                | R                | R      | ND    | ND    |       |       |
|        |               | 323 (1/1) | 1              | CEfm18                  | +                 | 2009      | 1              |    | G   | M                                                                             | H                           | +              | +                | +                  | R   | S   | S     | R                                   | R   | S                | S                | S      | S     | S     |       |       |
|        |               | 612 (1)   | 1              | CEfm37                  | +                 | 2011      | 1              |    | P   | M                                                                             | H                           | +              | +                | -                  | -   | R   | S     | S                                   | R   | R                | R                | S      | ND    | ND    |       |       |
|        | 2.1b (4)      | 324 (1)   | 1              | ASEfm51                 | -                 | 2009      | 1              |    | PHC | O                                                                             | NH                          | -              | -                | -                  | +   | S   | S     | S                                   | S   | S                | S                | S      | R     | S     |       |       |
|        |               | 704 (1)   | 1              | ASEfm42                 | -                 | 2009      | 1              |    | PHC | O                                                                             | NH                          | -              | -                | -                  | +   | S   | S     | S                                   | S   | ND               | ND               | S      | S     | S     |       |       |
|        |               | 301 (1)   | 1              | ASEfm56                 | -                 | 2009      |                | 1  |     | ER                                                                            | O                           | NH             | -                | -                  | -   | +   | S     | S                                   | S   | ND               | ND               | S      | S     | S     |       |       |
|        |               | 701 (1)   | 1              | ASEfm38                 | -                 | 2009      |                | 1  |     | PHC                                                                           | O                           | NH             | +                | +                  | -   | -   | R     | S                                   | S   | R                | ND               | ND     | S     | R     | S     |       |
|        | 2.3a (4)      | 706 (1)   | 1              | ASEfm54                 | -                 | 2009      |                | 1  |     | PHC                                                                           | O                           | NH             | -                | -                  | -   | S   | S     | S                                   | S   | ND               | ND               | S      | S     | S     |       |       |
|        |               | 92 (1)    | 1              | ASEfm6                  | -                 | 2009      |                | 1  |     | PHC                                                                           | O                           | NH             | +                | +                  | -   | +   | R     | S                                   | S   | R                | ND               | ND     | S     | S     | S     |       |
|        |               | 420 (1)   | 1              | CEfm24                  | -                 | 2009      |                | 1  |     | G                                                                             | M                           | H              | -                | -                  | -   | +   | R     | S                                   | S   | R                | ND               | ND     | S     | R     | S     |       |
|        | 2.3b (6)      | 25 (1)    | 1              | CEfm23                  | +                 | 2009      |                | 1  |     | PHC                                                                           | O                           | NH             | -                | -                  | -   | +   | R     | S                                   | S   | R                | S                | R      | S     | R     | R     |       |
|        |               | 165 (1)   | 1              | ASEfm34                 | -                 | 2009      |                | 1  |     | G                                                                             | O                           | NH             | -                | -                  | -   | -   | R     | S                                   | S   | R                | S                | S      | S     | S     | S     |       |
|        |               | 672 (2/1) | 1              | Cefm20                  | +                 | 2009-2011 | 1              | 1  |     | P; PHC                                                                        | M; O                        | NH; H          | +                | (1)                | +   | (1) | +     | (1)                                 | R   | S                | S                | R      | R (1) | R (1) | S     | R (1) |
|        |               | 515 (1)   | 1              | ASEfm43                 | -                 | 2009      |                | 1  |     | NE; PHC                                                                       | M                           | H              | -                | -                  | -   | +   | R     | S                                   | S   | R                | ND               | ND     | S     | R     | S     |       |
|        |               | 700 (1)   | 1              | ASEfm37                 | -                 | 2009      |                | 1  |     | PHC                                                                           | O                           | NH             | +                | +                  | -   | +   | R     | S                                   | S   | R                | ND               | ND     | S     | S     | S     |       |
|        | 3.1 (10)      | 70 (1)    | 1              | ASEfm40                 | -                 | 2009      |                | 1  |     | ER                                                                            | O                           | NH             | -                | -                  | -   | +   | R     | S                                   | S   | R                | ND               | ND     | S     | S     | S     |       |
|        |               | 707 (1)   | 1              | ASEfm49                 | -                 | 2009      |                | 1  |     | ER                                                                            | O                           | NH             | +                | +                  | -   | -   | S     | S                                   | S   | S                | ND               | ND     | S     | S     | S     |       |
| BAPS 3 | 3.1 (10)      | 32 (3/1)  | 3              | ASEfm3; ASEfm59; CEfm32 | +                 | (1)       | 2009-2010      | 1  | 2   | PHC                                                                           | O (2); M                    | NH (2); H (1)  | -                | -                  | -   | +   | (2)   | R (1)                               | S   | S                | R                | ND     | ND    | S     | R (1) |       |
|        |               | 22 (3)    | 3              | ASEfm1-2; ASEfm9        | -                 | 2009-2011 | 1              | 1  | 1   | PHC (2); ER                                                                   | O                           | NH             | -                | -                  | -   | +   | R (2) | S                                   | S   | R (1)            | ND               | ND     | S     | R (2) |       |       |
|        |               | 104 (1)   | 1              | ASEfm32                 | -                 | 2009      | 1              |    |     | PHC                                                                           | O                           | NH             | +                | +                  | -   | +   | R     | S                                   | S   | R                | ND               | ND     | S     | S     | S     |       |
|        |               | 159 (1)   | 1              | ASEfm33                 | -                 | 2009      |                | 1  |     | P                                                                             | M                           | H              | -                | -                  | -   | +   | R     | S                                   | S   | R                | ND               | ND     | S     | R     |       |       |
|        |               | 682 (1)   | 1              | ASEfm4                  | -                 | 2009      | 1              |    |     | CP                                                                            | I                           | H              | -                | -                  | -   | +   | S     | S                                   | S   | R                | ND               | ND     | S     | R     |       |       |
|        |               | 683 (1)   | 1              | ASEfm5                  | -                 | 2009      | 1              |    |     | P                                                                             | O                           | NH             | +                | +                  | -   | +   | R     | S                                   | S   | R                | ND               | ND     | S     | R     |       |       |
|        | 3.2 (1)       | 702 (1)   | 1              | ASEfm53                 | -                 | 2009      |                | 1  |     | T                                                                             | S                           | H              | -                | -                  | -   | +   | S     | S                                   | S   | R                | ND               | ND     | S     | R     |       |       |

|           |                       |                 |                                                                                                |            |           |      |   |   |                                            |                           |                |        |        |        |        |    |    |        |        |       |       |       |       |
|-----------|-----------------------|-----------------|------------------------------------------------------------------------------------------------|------------|-----------|------|---|---|--------------------------------------------|---------------------------|----------------|--------|--------|--------|--------|----|----|--------|--------|-------|-------|-------|-------|
| 3.3a (20) | 17 (14/6)             | 13 <sup>m</sup> | CEfm3 (2); CEfm6; CEfm11; CEfm13;<br>CEfm14 (2); CEfm16; CEfm25;<br>CEfm30(3); CEfm34; ASEfm50 | + (13)     | 2009-2010 | 1    | 4 | 9 | IM (5); PHC (3); CV (2);<br>GDS; HE; P; UR | M (9); O (2);<br>I (2); S | H (12); NH (2) | + (10) | + (13) | + (12) | R (13) | S  | S  | R (12) | R (12) | R (3) | R (3) | R (4) | R (2) |
|           | 18 (6/2)              | 6               | CEfm8; CEfm10; CEfm15;<br>CEfm28; CEfm35-36                                                    | +          | 2009-2011 | 2    | 2 | 2 | ID (2); PHC (2);<br>HE; NE                 | M (4); O (2)              | H (4); NH (2)  | -      | + (3)  | +      | R      | S  | S  | R (3)  | R (4)  | R (2) | S     | R (3) | R (1) |
| 3.3b (24) | 102 <sup>n</sup> (11) | 1 <sup>d</sup>  | ASEfm7                                                                                         | -          | 2009-2010 | 3    | 6 | 2 | PHC (5); ID (2); ER;<br>G; NE; P           | O (9); M (2)              | NH (9); H (2)  | + (6)  | + (1)  | -      | R (6)  | S  | S  | R (9)  | ND     | ND    | S     | S     | S     |
|           | 705 (3)               | 1 <sup>g</sup>  | ASEfm39                                                                                        | -          | 2009      |      |   | 1 | ER (2); T                                  | O (2); S                  | NH (2); H      | + (1)  | + (1)  | -      | R (2)  | S  | S  | R (1)  | ND     | ND    | S     | S     | S     |
|           | 709 <sup>o</sup> (2)  | 1 <sup>h</sup>  | ASEfm7.6                                                                                       | -          | 2009      |      |   | 2 | ER; PHC                                    | O                         | NH             | + (1)  | -      | -      | R      | S  | S  | S      | ND     | ND    | S     | S     | S     |
|           | 708 <sup>o</sup> (1)  | 1 <sup>i</sup>  | ASEfm7.3 <sup>c</sup>                                                                          | -          | 2010      |      |   | 1 | PHC                                        | O                         | NH             | -      | -      | -      | S      | S  | S  | S      | ND     | ND    | S     | S     | S     |
|           | 710 <sup>o</sup> (1)  | 1 <sup>j</sup>  | ASEfm7.1                                                                                       | -          | 2010      |      |   | 1 | PHC                                        | O                         | NH             | -      | -      | -      | R      | S  | S  | S      | ND     | ND    | S     | S     | S     |
|           | 711 (1)               | 1               | ASEfm8                                                                                         | -          | 2009      | 1    |   |   | PHC                                        | O                         | NH             | -      | -      | -      | S      | S  | S  | R      | ND     | ND    | S     | S     | S     |
|           | 513 (1)               | 1               | CEfm41                                                                                         | +          | 2010      |      |   | 1 | PHC                                        | O                         | NH             | -      | -      | +      | R      | S  | S  | R      | R      | S     | S     | R     | S     |
|           | 681 (1/1)             | 1               | CEfm33                                                                                         | +          | 2009      | 1    |   |   | P                                          | O                         | NH             | +      | -      | +      | R      | S  | S  | R      | ND     | ND    | S     | S     | S     |
|           | 673 (1/1)             | 1               | CEfm31                                                                                         | +          | 2010      |      |   | 1 | PHC                                        | O                         | NH             | -      | -      | +      | R      | S  | S  | S      | S      | S     | S     | S     | S     |
|           | 253 (1)               | 1               | ASEfm60                                                                                        | -          | 2011      | 1    |   |   | PHC                                        | O                         | H              | -      | -      | -      | ND     | ND | ND | ND     | ND     | ND    | ND    | ND    | ND    |
|           | 712 (1)               | 1               | ASEfm58                                                                                        | -          | 2009      |      |   | 1 | IM                                         | M                         | H              | -      | -      | -      | R      | S  | S  | R      | ND     | ND    | S     | R     | S     |
| BAPS 7    | 7.1 (8)               | 19 (1)          | 1 <sup>k</sup><br>CEfm5                                                                        | +          | 2009      | 1    | 2 | 1 | PHC (2); C; ER                             | O (3); M                  | NH (3); H      | -      | -      | +      | R      | S  | S  | R      | R (2)  | R (2) | S     | R     | R (1) |
|           |                       | 687 (1)         | 1                                                                                              | ASEfm16    | -         | 2011 | 1 |   | PHC                                        | O                         | NH             | -      | -      | +      | R      | S  | S  | S      | ND     | ND    | S     | S     | S     |
|           |                       | 703 (1/1)       | 1                                                                                              | CEfm38     | +         | 2009 |   | 1 | GDS                                        | S                         | H              | -      | -      | -      | ND     | S  | S  | ND     | ND     | ND    | ND    | ND    | ND    |
|           |                       | 675 (1)         | 1                                                                                              | ASEfm55    | -         | 2009 |   | 1 | PHC                                        | O                         | NH             | -      | -      | -      | S      | S  | S  | S      | ND     | ND    | S     | S     | S     |
|           |                       | 699 (1)         | 1                                                                                              | ASEfm35    | -         | 2009 |   | 1 | PHC                                        | O                         | NH             | -      | -      | -      | S      | S  | S  | S      | ND     | ND    | S     | S     | S     |
|           | 7.3 (3)               | 718 (1/1)       | 1                                                                                              | CEfm2      | +         | 2009 |   | 1 | R                                          | M                         | H              | -      | -      | -      | R      | S  | S  | R      | S      | S     | S     | R     | S     |
|           |                       | 716 (1)         | 1 <sup>f</sup>                                                                                 | ASEfm7.5   | -         | 2011 | 1 |   | PHC                                        | O                         | NH             | +      | -      | -      | S      | S  | S  | S      | ND     | ND    | S     | S     | S     |
|           |                       | 59 (1)          | 1                                                                                              | ASEfm36    | -         | 2009 |   | 1 | PHC                                        | O                         | NH             | -      | -      | -      | R      | S  | S  | R      | ND     | ND    | S     | S     | S     |
| BAPS 8    | (4)                   | 698 (2)         | 2                                                                                              | ASEfm27-28 | -         | 2009 | 1 | 1 | PHC; T                                     | O; S                      | NH; H          | +      | -      | +      | R (1)  | S  | S  | S      | ND     | ND    | S     | S     | S     |
|           |                       | 689 (1)         | 1                                                                                              | ASEfm61    | -         | 2009 |   | 1 | PHC                                        | O                         | NH             | -      | -      | +      | S      | S  | S  | S      | ND     | ND    | S     | S     | S     |
|           |                       | 690 (1)         | 1                                                                                              | ASEfm18    | -         | 2009 |   | 1 | PHC                                        | O                         | NH             | +      | -      | +      | S      | S  | S  | S      | ND     | ND    | S     | S     | S     |

\*the numbers in after the bar (/) corresponds to the number of AREfm isolates that were only cultured after culture enrichment; PFGE clones were named as

CEfm plus the number of the clone, or eventually ASEfm and AREfm to highlight the ampicillin susceptibility or resistance phenotype; <sup>a</sup>two strains have a PFGE pattern that has 3 different bands; <sup>b</sup>PFGE patterns with 1 band of difference; <sup>c</sup>although strains have different STs they have the same PFGE-type; <sup>d</sup>PFGE pattern that has up to 5 bands of difference; <sup>e</sup>3 of the 25 strains that belong to this PFGE-type have 2 bands of difference; <sup>f</sup>PFGE-type with 5 bands of difference regarding ST102-PFGE-type; <sup>g</sup>PFGE-type with 1 band of difference; <sup>h</sup>PFGE-type with 6 bands of difference regarding ST102-PFGE-type; <sup>i</sup>PFGE-type with 3 bands of difference regarding ST102-PFGE-type; <sup>j</sup>PFGE-type with 1 band of difference regarding ST102-PFGE-type; <sup>k</sup>PFGE pattern that has up to 2 bands difference; <sup>l</sup>High level resistance; <sup>m</sup>It is of note that these ST17 strains were among those more frequently detected from samples of patients with bacteremia in our hospital admitted to different wards and locations; <sup>n</sup>Isolates classified as ST102 and its SLVs (ST709, ST708, ST710 and ST711) showed very similar PFGE types (ASEfm7, up to 5 bands difference). Abbreviations: BAPS, Bayesian Analysis of Population Structure; ST, Sequence Type; AREfm, Ampicillin resistance *E. faecium*; VF, Virulence factors; *esp*, Enterococcal Surface Protein; *hyl*<sub>Efm</sub>, Glycosyl Hydrolase; *acm*, Collagen-binding Adhesin Gene ; NH, Non-

Hospital; H, Hospital; O, Outpatient; M, Medical; S, Surgical; I, ICU; ND, Not determined; Group I, 0-19 years old; Group II, 20-59 years old; Group III,  $\geq 60$  years old; C, Cardiology; CV, Cardiovascular; CP, Cardiopediatrics; E, Endocrinology; ER, Emergency room; G, Gastroenterology; GDS, General and Digestive Surgery; GI, Gynecology; HE, Hematology; ID, Infectious Diseases; IM, Internal Medicine; NE, Neurology; NM, Neumology; NP, Nephrology; OC, Oncology; OT, Otorhinolaryngology; P, Pediatrics; PS, Plastic Surgery; PHC, Primary health center; R, Rheumatology; T, Traumatology; UR, Urology; AMP, Ampicillin; ERY, Erythromycin; VAN, Vancomycin; TEI, Teicoplanin; CIP, Ciprofloxacin; LEV, Levofloxacin; STR, Streptomycin; GEN, Gentamicin; TET, Tetracycline; CHL, Chloramphenicol.



**Table S2. *E. faecalis* isolates epidemiological data.**

| BAPS<br>(No)       | ST       |                |            | PFGE-type (No)                                                             | Year      | Age Group (No) |    |     | Ward (No)                                    |                     | Origin<br>(No) | VF (No)     |             |            |               |             | Antibiotic resistance (No) |       |       |                  |                  |        |       |        |       |
|--------------------|----------|----------------|------------|----------------------------------------------------------------------------|-----------|----------------|----|-----|----------------------------------------------|---------------------|----------------|-------------|-------------|------------|---------------|-------------|----------------------------|-------|-------|------------------|------------------|--------|-------|--------|-------|
|                    | ST<br>No | No<br>PFGE     | CC<br>(No) |                                                                            |           | I              | II | III | Name                                         | Type                |                | <i>asaI</i> | <i>gelE</i> | <i>esp</i> | <i>hylEfc</i> | <i>cylA</i> | AMP                        | VAN   | TEI   | STR <sup>a</sup> | GEN <sup>a</sup> | LEV    | ERI   | TET    | CHO   |
| <b>BAPS 1</b> (48) | 6 (16)   | 1 <sup>c</sup> | 6 (16)     | H10                                                                        | 2009-2010 | 1              | 4  | 11  | IM (6); NE (3); PHC (2);<br>T (2); CV; ER; P | M (12);<br>O (3); I | H (13); NH (3) | +           | + (13)      | + (6)      | -             | + (9)       | S                          | R (5) | R (5) | R                | R                | R (14) | R     | R (15) | R (1) |
|                    | 513 (6)  | 1              | 242 (6)    | CEfc35                                                                     | 2009-2010 | 1              | 2  | 3   | PHC (4); GDS; ID                             | O (4); M; I         | NH (4); H (2)  | + (2)       | + (1)       | + (1)      | -             | + (3)       | S                          | S     | ND    | R (2)            | S                | R (1)  | R (2) | R (3)  | S     |
|                    | 72 (5)   | 4              | 72 (5)     | CEfc30-33                                                                  | 2009-2011 | 2              | 2  |     | ER; P; PHC; R                                | O (2); M (2)        | NH (2); H (2)  | + (2)       | + (3)       | -          | -             | -           | S                          | S     | S     | S                | S                | S      | S     | S      | S     |
|                    | 168 (1)  | 1              |            | CEfc34                                                                     | 2009      |                |    | 1   | PHC                                          | O                   | NH             | +           | +           | -          | -             | -           | S                          | S     | ND    | S                | S                | S      | S     | R      | S     |
|                    | 64 (3)   | 3              | 8 (4)      | CEfc2-4                                                                    | 2009      | 2              | 1  |     | HE; P; PHC                                   | M (2); O (1)        | H (2); NH (1)  | +           | +           | -          | -             | -           | S                          | S     | S     | S                | S                | S      | R (2) | R (2)  | S     |
|                    | 8 (1)    | 1              |            | CEfc1                                                                      | 2009      |                |    | 1   | HE                                           | M                   | H              | +           | +           | +          | -             | -           | S                          | S     | ND    | S                | S                | S      | S     | R      | S     |
|                    | 34 (2)   | 1 <sup>m</sup> | 34 (2)     | CEfc21                                                                     | 2009      | 1              | 1  |     | G; PHC                                       | O; M                | NH; H          | + (1)       | +           | + (1)      | -             | -           | S                          | S     | S     | S                | R (1)            | S      | R (1) | R (1)  | ND    |
|                    | 79 (2)   | 2              | 79 (2)     | CEfc59-60                                                                  | 2009      | 2              |    |     | P; PHC                                       | O; M                | NH; H          | -           | +           | -          | -             | -           | S                          | S     | ND    | S                | S                | S      | S     | S      | ND    |
|                    | 81 (1)   | 1              | 81 (2)     | CEfc55                                                                     | 2010      | 1              |    |     | CP                                           | I                   | H              | +           | +           | -          | -             | -           | S                          | S     | ND    | S                | S                | S      | S     | S      | S     |
|                    | 332 (1)  | 1              | 272 (2)    | CEfc47                                                                     | 2009      | 1              |    |     | PHC                                          | O                   | NH             | +           | +           | -          | -             | -           | S                          | S     | S     | S                | S                | S      | S     | S      | ND    |
|                    | 517 (1)  | 1              |            | CEfc48                                                                     | 2009      | 1              |    |     | PHC                                          | O                   | NH             | +           | +           | -          | -             | -           | S                          | S     | ND    | S                | S                | S      | S     | S      | ND    |
|                    | 27 (1)   | 1              | 27 (1)     | CEfc57                                                                     | 2009      |                |    | 1   | PHC                                          | O                   | NH             | +           | +           | -          | -             | -           | S                          | S     | S     | S                | S                | S      | S     | S      | ND    |
|                    | 82 (1)   | 1              | 82 (1)     | CEfc69                                                                     | 2009      |                |    | 1   | IM                                           | M                   | H              | -           | +           | -          | -             | -           | S                          | S     | S     | S                | S                | S      | S     | S      | ND    |
|                    | 282 (1)  | 1              | 121 (1)    | CEfc37                                                                     | 2009      |                |    | 1   | G                                            | M                   | H              | -           | +           | -          | -             | -           | S                          | S     | S     | S                | S                | S      | R     | S      | ND    |
|                    | 241 (1)  | 1              | 241 (1)    | CEfc43                                                                     | 2009      |                |    | 1   | GDS                                          | I                   | H              | -           | +           | +          | -             | +           | S                          | S     | S     | S                | S                | S      | S     | S      | S     |
|                    | 197 (1)  | 1              | D (1)      | CEfc42                                                                     | 2009      |                |    | 1   | PHC                                          | O                   | H              | -           | -           | -          | -             | -           | S                          | S     | S     | S                | S                | S      | S     | S      | ND    |
|                    | 323 (1)  | 1              | D (1)      | CEfc56                                                                     | 2009      |                |    | 1   | ER                                           | O                   | NH             | -           | -           | -          | -             | -           | S                          | S     | S     | S                | S                | S      | S     | S      | ND    |
|                    | 515 (2)  | 2              | S (2)      | CEfc44-45                                                                  | 2009      | 2              |    |     | PHC                                          | O                   | NH             | +           | + (1)       | -          | -             | + (1)       | S                          | S     | ND    | S                | S                | S      | S     | S      | S     |
|                    | 516 (1)  | 1              | S (1)      | CEfc46                                                                     | 2009      |                |    | 1   | ER                                           | O                   | NH             | -           | +           | -          | -             | -           | S                          | S     | ND    | S                | S                | S      | I     | S      | S     |
|                    | 520 (1)  | 1              | S (1)      | CEfc67                                                                     | 2009      |                |    | 1   | PHC                                          | O                   | NH             | -           | +           | -          | -             | -           | S                          | S     | S     | S                | S                | S      | S     | S      | ND    |
| <b>BAPS 2</b> (52) | 40 (15)  | 9 <sup>c</sup> | 40 (17)    | CEfc23; CEfc24 (2); CEfc25 (3);<br>CEfc26 (5); CEfc27;<br>CEfc28.5; CEfc52 | 2009-2011 | 7              | 2  | 6   | PHC (7); ER (2); P (2);<br>ID; NP; T; UR     | O (10); M (5)       | NH (10); H (5) | + (6)       | + (13)      | + (6)      | -             | + (1)       | S                          | S     | S     | R (1)            | S                | S      | R (7) | R (10) | S     |
|                    | 268 (2)  | 1 <sup>d</sup> |            | CEfc28                                                                     | 2009-2011 | 1              |    | 1   | P; PHC                                       | O; M                | NH; H          | + (1)       | +           | +          | -             | -           | S                          | S     | S     | S                | S                | S      | R (1) | R      | S     |
|                    | 25 (3)   | 2              | 25 (7)     | CEfc11; CEfc12 (2)                                                         | 2009      | 2              |    | 1   | GDS; P; PHC                                  | O (2); M            | NH (2); H      | + (2)       | +           | +          | -             | + (1)       | S                          | S     | S     | S                | S                | S      | R (1) | R (1)  | S     |
|                    | 97 (1)   | 1              |            |                                                                            | 2009      | 1              |    |     | P                                            | M                   | H              | +           | +           | -          | -             | -           | S                          | S     | ND    | S                | S                | S      | S     | S      | S     |
|                    | 269 (1)  | 1              |            | CEfc15                                                                     | 2009      |                |    | 1   | PHC                                          | O                   | NH             | -           | +           | +          | -             | -           | S                          | S     | S     | S                | S                | S      | S     | S      | ND    |
|                    | 55 (4)   | 1 <sup>g</sup> | 55 (7)     | CEfc29                                                                     | 2009-2011 | 1              | 1  | 2   | PHC (2); CP; UR                              | O (2); M; I         | NH (2); H (2)  | +           | + (1)       | + (3)      | -             | -           | S                          | S     | ND    | R (1)            | S                | S      | R (3) | R      | S     |
|                    | 285 (1)  | 1 <sup>h</sup> |            | CEfc29                                                                     | 2011      | 1              |    |     | P                                            | M                   | H              | -           | -           | +          | -             | -           | S                          | S     | ND    | S                | S                | S      | R     | R      | R     |
|                    | 510 (1)  | 1 <sup>i</sup> |            | CEfc29.1'                                                                  | 2009      | 1              |    |     | PHC                                          | O                   | NH             | -           | +           | +          | -             | -           | S                          | S     | ND    | S                | S                | S      | R     | R      | R     |
|                    | 511 (1)  | 1 <sup>h</sup> |            | CEfc29                                                                     | 2009      |                |    | 1   | ER                                           | O                   | NH             | -           | +           | +          | -             | -           | S                          | S     | ND    | S                | S                | S      | S     | R      | R     |
|                    | 56 (2)   | 2              | 30 (4)     | CEfc18-19                                                                  | 2009      | 1              | 1  |     | G; PHC                                       | O; M                | NH; H          | + (1)       | + (1)       | -          | -             | +           | S                          | S     | ND    | S                | S                | S      | R (1) | R      | S     |
|                    | 30 (1)   | 1              |            | CEfc17                                                                     | 2009      |                |    | 1   | PHC                                          | O                   | NH             | +           | +           | +          | -             | -           | S                          | S     | ND    | S                | S                | S      | S     | R      | ND    |
|                    | 379 (1)  | 1              |            | CEfc20                                                                     | 2009      |                |    | 1   | ER                                           | O                   | NH             | -           | +           | +          | -             | -           | S                          | S     | S     | R                | S                | S      | R     | S      | ND    |

|                    |                |                |                                       |           |   |   |                                      |                    |               |               |   |   |   |   |   |   |    |       |       |       |       |       |       |       |
|--------------------|----------------|----------------|---------------------------------------|-----------|---|---|--------------------------------------|--------------------|---------------|---------------|---|---|---|---|---|---|----|-------|-------|-------|-------|-------|-------|-------|
| 191 (2)            | 2              | 191 (3)        | CEfc39-40                             | 2009-2010 | 1 | 1 | PHC                                  | O                  | NH            | +             | + | + | - | - | S | S | ND | S     | S     | R (1) | R (1) | R     | ND    |       |
| 514 (1)            | 1              |                | CEfc41                                | 2009      |   | 1 | PHC                                  | O                  | NH            | +             | + | + | - | - | S | S | ND | S     | S     | S     | S     | S     | ND    |       |
| 19 (2)             | 1 <sup>l</sup> | 19 (2)         | CEfc7                                 | 2009      | 1 | 1 | PHC                                  | O                  | NH            | +             | + | + | - | - | S | S | S  | S     | S     | S     | S     | R     | S     |       |
| 21 (2)             | 2              | 21 (2)         | CEfc8-9                               | 2009-2010 | 1 | 1 | HE; PHC                              | O; M               | NH; H         | +             | + | + | - | - | S | S | ND | S     | S     | S     | S     | R (1) | S     |       |
| 512 (1)            | 1              |                | CEfc22                                | 2009      |   | 1 | PHC                                  | O                  | NH            | +             | + | - | - | - | S | S | ND | S     | S     | S     | R     | S     | ND    |       |
| 116 (2)            | 1 <sup>g</sup> | 116 (2)        | CEfc36                                | 2009      | 1 | 1 | ER; PHC                              | O                  | NH            | -             | + | - | - | - | S | S | S  | R (1) | S     | S     | R     | R (1) | ND    |       |
| 509 (1)            | 1              | 26 (1)         | CEfc16                                | 2009      | 1 |   | PHC                                  | O                  | NH            | -             | + | + | - | - | S | S | ND | S     | S     | S     | S     | R     | ND    |       |
| 41 (1)             | 1              | 41 (1)         | CEf21                                 | 2009      |   | 1 | PHC                                  | O                  | NH            | -             | + | + | - | - | S | S | ND | R     | S     | S     | S     | R     | ND    |       |
| 74 (1)             | 1              | 73 (1)         | CEfc58                                | 2010      |   | 1 | PHC                                  | O                  | NH            | -             | - | - | - | - | S | S | ND | S     | S     | S     | S     | S     | S     |       |
| 508 (1)            | 1              | 206 (1)        | CEfc51                                | 2009      |   | 1 | PHC                                  | O                  | NH            | +             | + | - | - | + | S | S | ND | S     | S     | S     | S     | R     | S     |       |
| 86 (2)             | 1              | S (2)          | CEfc61                                | 2009      | 2 |   | G; NP                                | M                  | H             | +             | + | + | - | + | S | S | S  | S     | R (1) | R (1) | R     | R     | ND    |       |
| 147 (1)            | 1              | S (1)          | CEfc62                                | 2009      | 1 |   | PHC                                  | O                  | NH            | -             | - | - | - | - | S | S | S  | S     | S     | S     | S     | S     | ND    |       |
| 321 (1)            | 1              | S (1)          | CEfc64                                | 2009      | 1 |   | P                                    | M                  | H             | +             | + | + | - | + | S | S | S  | S     | S     | S     | R     | S     | ND    |       |
| 322 (1)            | 1              | S (1)          | CEfc65                                | 2009      | 1 |   | P                                    | M                  | H             | +             | - | + | - | - | S | S | S  | R     | S     | S     | S     | S     | ND    |       |
| <b>BAPS 3 (30)</b> | 179 (11)       | 1 <sup>a</sup> | EFC11                                 | 2009-2011 | 5 | 5 | PHC (3); P (3); ER (2);<br>G; IM; OT | O (7);<br>M (3); I | NH (7); H (4) | +             | + | + | - | + | S | S | S  | S     | S     | S     | R (4) | R (8) | S     |       |
| 16 (7)             | 4 <sup>b</sup> |                | CEfc5 (4); CEfc6;<br>CEfc50; Degraded | 2009-2011 | 1 | 4 | 2                                    | PHC (4); ER; OC; P | O (5); M (2)  | NH (5); H (2) | + | + | + | - | + | S | S  | S     | R (3) | R (3) | R (2) | R (6) | R (6) | R (4) |
| 62 (2)             | 2 <sup>f</sup> |                | CEfc12.5; CEfc13                      | 2009      | 2 |   | P; PHC                               | O; M               | NH; H         | +             | + | + | - | - | S | S | ND | S     | S     | S     | S     | R     | S     |       |
| 333 (1)            | 1 <sup>j</sup> | 28 (3)         | CEfc49.4                              | 2009      |   | 1 | IM                                   | M                  | H             | +             | + | + | - | + | S | S | S  | R     | R     | R     | R     | R     | ND    |       |
| 518 (1)            | 1              |                | CEfc49                                | 2009      | 1 |   | CV                                   | I                  | H             | +             | + | + | - | + | S | S | ND | R     | R     | S     | R     | R     | ND    |       |
| 519 (1)            | 1 <sup>k</sup> |                | CEfc49                                | 2009      | 1 |   | CV                                   | I                  | H             | +             | + | + | - | + | S | S | ND | R     | R     | R     | R     | R     | S     |       |
| 35 (1)             | 1              | 35 (1)         | CEfc22                                | 2010      |   | 1 | PHC                                  | O                  | NH            | -             | + | - | - | - | S | S | ND | S     | S     | R     | R     | R     | S     |       |
| 320 (1)            | 1              | 58 (1)         | CEfc53                                | 2009      |   | 1 | PHC                                  | O                  | NH            | -             | + | - | - | - | S | S | S  | S     | S     | S     | S     | S     | ND    |       |
| 141 (1)            | 1              | 141 (1)        | CEfc38                                | 2009      | 1 |   | PHC                                  | O                  | NH            | -             | + | - | - | - | S | S | S  | S     | S     | S     | S     | S     | ND    |       |
| 225 (1)            | 1              | S (1)          | CEfc63                                | 2009      | 1 |   | ID                                   | M                  | H             | -             | + | - | - | - | S | S | ND | S     | S     | S     | R     | S     | ND    |       |
| 330 (1)            | 1              | S (1)          | CEfc66                                | 2009      | 1 | 1 | IM; ID                               | O; M               | NH; H         | +             | + | + | - | - | S | S | S  | R     | S     | R     | R     | R (1) | ND    |       |
| 521 (1)            | 1              | S (1)          | CEfc68                                | 2009      |   | 1 | ER                                   | O                  | NH            | -             | - | - | - | - | S | S | ND | S     | S     | S     | S     | S     | S     |       |

PFGE clones were named CEfc plus the number of the clone; <sup>a</sup>CEfc5 has up to 5 bands of difference; <sup>b</sup>up to 3 bands of difference; <sup>c</sup>Several PFGE-types here prevalent.

Among this PFGE-types there are up to 5 bands of difference; <sup>d</sup>5 bands of difference compared with ST40- CEfc28; <sup>e</sup>up to 6 bands of difference when comparing to V583; <sup>f</sup>5 bands of difference to ST25-CEfc12; <sup>g</sup>up to 2 bands of difference; <sup>h</sup>1 band of difference regarding ST50-CEfc29; <sup>i</sup>the same PFGE type as ST50-CEfc29; <sup>j</sup>the same PFGE as ST518; <sup>k</sup>4 bands of difference regarding ST518; <sup>l</sup>up to 6 bands of difference; <sup>m</sup>up to 1 bands of difference; <sup>n</sup>High level resistance. Abbreviations: BAPS - Bayesian Analysis of Population Structure; MLST – Multilocus Sequence Typing; CC – Clonal Complex; ST - Sequence Type; VR - Virulence factors; *esp* - Enterococcal Surface Protein; *hyl*<sub>Efc</sub> -

Glycosyl Hydrolase; *cylA* - cytolysin/haemolysin; *gelE* - gelatinase; *asaI* - aggregation substance; NH - Non-Hospital; H -Hospital; O - Outpatient; M - Medical; S - Surgical; I - ICU; ND - Not determined; Group I - 0-19 years old; Group II - 20-59 years old; Group III -  $\geq 60$  years old; CV - Cardiovascular; CP - Cardiopediatrics; ER - Emergency room; G - Gastroenterology; GDS - General and Digestive Surgery; HE - Hematology; ID - Infectious Diseases; IM - Internal Medicine; NE – Neurology; NP - Nephrology; OC - Oncology; OT - Otorhinolaryngology; P - Pediatrics; PHC - Primary health center; R - Rheumatology; T - Traumatology; UR – Urology; AMP - Ampicillin; ERY - Erythromycin; VAN - Vancomycin; TEI - Teicoplanin; CIP - Ciprofloxacin; LEV - Levofloxacin; STR - Streptomycin; GEN - Gentamicin; TET - Tetracycline; CHL – Chloramphenicol.

**Table S3. ORs analysis of *E. faecium* BAPS groups/subgroups regarding the origin of isolates.**

| BAPS          |             | Hospitalized patients |        |                 |       |        |        | Non-hospitalized patients |       |                 |       |         |         | Animal     |        |                 |       |         | Environmental |           | Food  |           | Others |            |       |
|---------------|-------------|-----------------------|--------|-----------------|-------|--------|--------|---------------------------|-------|-----------------|-------|---------|---------|------------|--------|-----------------|-------|---------|---------------|-----------|-------|-----------|--------|------------|-------|
| Group         | Subgroup    | No                    | %      | OR <sup>a</sup> | p     | 95% CI |        | No                        | %     | OR <sup>a</sup> | p     | 95% CI  |         | No         | %      | OR <sup>a</sup> | p     | 95% CI  |               | No        | %     | No        | %      | No         | %     |
| <b>BAPS 1</b> | <b>1.1</b>  | 3                     | 0.20%  | ND              |       |        |        | 1                         | 0.07% | ND              |       |         |         | 0          | 0.00%  | ND              |       |         |               | 1         | 0.07% | 0         | 0.00%  | 6          | 0.40% |
|               | <b>1.2</b>  | 37                    | 2.45%  | 0.0386          | <0.01 | 0.0232 | 0.0640 | 33                        | 2.19% | 35.1080         | <0.01 | 17.0839 | 72.1480 | 3          | 0.20%  | 1.2816          | 0.698 | 0.3667  | 4.4793        | 13        | 0.86% | 4         | 0.27%  | 10         | 0.66% |
|               | <b>1.3</b>  | 2                     | 0.13%  | 0.0109          | <0.01 | 0.0024 | 0.0492 | 1                         | 0.07% | ND              |       |         |         | 4          | 0.27%  | ND              |       |         |               | 1         | 0.07% | 2         | 0.13%  | 6          | 0.40% |
|               | <b>1.4</b>  | 1                     | 0.07%  | ND              |       |        |        | 0                         | 0.00% | ND              |       |         |         | 1          | 0.07%  | ND              |       |         |               | 0         | 0.00% | 0         | 0.00%  | 0          | 0.00% |
|               | <b>1.5</b>  | 14                    | 0.93%  | 0.0394          | <0.01 | 0.0194 | 0.0802 | 7                         | 0.46% | ND              |       |         |         | 6          | 0.40%  | 7.1036          | <0.01 | 2.6186  | 19.2698       | 1         | 0.07% | 0         | 0.00%  | 13         | 0.86% |
|               | <b>1.6</b>  | 1                     | 0.07%  | ND              |       |        |        | 2                         | 0.13% | ND              |       |         |         | 1          | 0.07%  | ND              |       |         |               | 0         | 0.00% | 0         | 0.00%  | 2          | 0.13% |
| <b>BAPS 2</b> | <b>2.1a</b> | 479                   | 31.74% | 0.3672          | <0.01 | 0.2551 | 0.5289 | 15                        | 0.99% | 1.7320          | 0.165 | 0.7978  | 3.7625  | 56         | 3.71%  | 4.4539          | <0.01 | 2.5256  | 7.8547        | 4         | 0.27% | 0         | 0.00%  | 23         | 1.52% |
|               | <b>2.1b</b> | 60                    | 3.98%  | 0.0174          | <0.01 | 0.0116 | 0.0262 | 24                        | 1.59% | 4.9073          | <0.01 | 2.3729  | 10.1485 | 182        | 12.06% | 54.2563         | <0.01 | 31.5295 | 93.3649       | 15        | 0.99% | 10        | 0.66%  | 30         | 1.99% |
|               | <b>2.3a</b> | 72                    | 4.77%  | 0.0844          | <0.01 | 0.0539 | 0.1320 | 17                        | 1.13% | 8.5132          | <0.01 | 4.3025  | 20.2869 | 20         | 1.33%  | 7.2065          | <0.01 | 3.6271  | 14.3184       | 9         | 0.60% | 0         | 0.00%  | 17         | 1.13% |
|               | <b>2.3b</b> | 13                    | 0.86%  | 0.0275          | <0.01 | 0.0136 | 0.0552 | 8                         | 0.53% | ND              |       |         |         | 22         | 1.46%  | 33.7639         | <0.01 | 15.9460 | 71.4912       | 3         | 0.20% | 2         | 0.13%  | 1          | 0.07% |
| <b>BAPS 3</b> | <b>3.1</b>  | 67                    | 4.44%  | 0.0927          | <0.01 | 0.0584 | 0.1471 | 15                        | 0.99% | 8.5132          | <0.01 | 3.8086  | 19.0289 | 21         | 1.39%  | 8.6157          | <0.01 | 4.3507  | 17.0619       | 5         | 0.33% | 2         | 0.13%  | 12         | 0.80% |
|               | <b>3.2</b>  | 16                    | 1.06%  | 0.0283          | <0.01 | 0.0148 | 0.0539 | 12                        | 0.80% | ND              |       |         |         | 20         | 1.33%  | 21.2500         | <0.01 | 10.2157 | 44.2028       | 3         | 0.20% | 0         | 0.00%  | 8          | 0.53% |
|               | <b>3.3a</b> | 630                   | 41.75% | #               | #     | #      | #      | 12                        | 0.80% | #               | #     | #       | #       | 16         | 1.06%  | #               | #     | #       |               | 4         | 0.27% | 1         | 0.07%  | 16         | 1.06% |
|               | <b>3.3b</b> | 29                    | 1.92%  | 0.0333          | <0.01 | 0.0195 | 0.0567 | 24                        | 1.59% | 22.6594         | <0.01 | 10.6789 | 48.0809 | 25         | 1.66%  | 15.4618         | <0.01 | 7.8651  | 30.3956       | 3         | 0.20% | 3         | 0.20%  | 8          | 0.53% |
| <b>BAPS 4</b> |             | 6                     | 0.40%  | ND              |       |        |        | 2                         | 0.13% | ND              |       |         |         | 0          | 0.00%  | ND              |       |         |               | 1         | 0.07% | 0         | 0.00%  | 2          | 0.13% |
| <b>BAPS 5</b> |             | 14                    | 0.93%  | 0.2130          | <0.01 | 0.0736 | 0.6163 | 0                         | 0.00% | ND              |       |         |         | 3          | 0.20%  | ND              |       |         |               | 1         | 0.07% | 0         | 0.00%  | 1          | 0.07% |
| <b>BAPS 6</b> |             | 9                     | 0.60%  | ND              |       |        |        | 0                         | 0.00% | ND              |       |         |         | 0          | 0.00%  | ND              |       |         |               | 0         | 0.00% | 0         | 0.00%  | 0          | 0.00% |
| <b>BAPS 7</b> | <b>7.1</b>  | 41                    | 2.72%  | 0.0395          | <0.01 | 0.0245 | 0.0637 | 7                         | 0.46% | 3.7619          | <0.01 | 1.4284  | 9.9075  | 54         | 3.58%  | 33.9034         | <0.01 | 18.3744 | 62.5597       | 2         | 0.13% | 7         | 0.46%  | 9          | 0.60% |
|               | <b>7.2</b>  | 3                     | 0.20%  | ND              |       |        |        | 0                         | 0.00% | ND              |       |         |         | 0          | 0.00%  | ND              |       |         |               | 0         | 0.00% | 0         | 0.00%  | 3          | 0.20% |
|               | <b>7.3</b>  | 4                     | 0.27%  | ND              |       |        |        | 6                         | 0.40% | ND              |       |         |         | 3          | 0.20%  | ND              |       |         |               | 1         | 0.07% | 0         | 0.00%  | 0          | 0.00% |
|               | <b>7.4</b>  | 2                     | 0.13%  | ND              |       |        |        | 0                         | 0.00% | ND              |       |         |         | 0          | 0.00%  | ND              |       |         |               | 0         | 0.00% | 0         | 0.00%  | 0          | 0.00% |
| <b>BAPS 8</b> |             | 6                     | 0.40%  | ND              |       |        |        | 3                         | 0.20% | ND              |       |         |         | 0          | 0.00%  | ND              |       |         |               | 1         | 0.07% | 0         | 0.00%  | 1          | 0.07% |
| <b>TOTAL</b>  |             | <b>1509</b>           |        |                 |       |        |        | <b>189</b>                |       |                 |       |         |         | <b>437</b> |        |                 |       |         |               | <b>68</b> |       | <b>31</b> |        | <b>168</b> |       |

<sup>a</sup>using BAPS 3.3a as a reference group

**Table S4. *E. faecalis* BAPS analysis data.**

| <b>BAPS</b>   |               |              |                    |
|---------------|---------------|--------------|--------------------|
| <b>Group</b>  | <b>No STs</b> | <b>% STs</b> | <b>No isolates</b> |
| <b>BAPS 1</b> | 234           | 44.74%       | 576                |
| <b>BAPS 2</b> | 144           | 27.53%       | 417                |
| <b>BAPS 3</b> | 108           | 20.65%       | 270                |
| <b>BAPS 4</b> | 5             | 0.96%        | 5                  |
| <b>BAPS 5</b> | 32            | 6.12%        | 42                 |
| <b>TOTAL</b>  | <b>523</b>    |              | <b>1310</b>        |

**Table S5. ORs analysis of *E. faecalis* BAPS groups regarding the origin of isolates.**

| BAPS          | Hospitalized patients |        |                 |       |        | Non-hospitalized patients |            |                 |        |        | Animal |        |                 |        |        | Environmental |        | Food   |           | Others |           |        |           |        |
|---------------|-----------------------|--------|-----------------|-------|--------|---------------------------|------------|-----------------|--------|--------|--------|--------|-----------------|--------|--------|---------------|--------|--------|-----------|--------|-----------|--------|-----------|--------|
|               | No                    | %      | OR <sup>a</sup> | p     | 95% CI | No                        | %          | OR <sup>a</sup> | p      | 95% CI | No     | %      | OR <sup>a</sup> | p      | 95% CI | No            | %      | No     | %         | No     | %         |        |           |        |
| <b>BAPS 1</b> | 316                   | 45,01% | #               | #     | #      | #                         | 70         | 36,27%          | #      | #      | #      | #      | 114             | 47,11% | #      | #             | #      | #      | 10        | 47,62% | 31        | 40,26% | 35        | 46,67% |
| <b>BAPS 2</b> | 206                   | 29,34% | 0,8033          | 0,089 | 0,6240 | 1,0341                    | 85         | 44,04%          | 1,8507 | <0,01  | 1,3103 | 2,6139 | 43              | 17,77% | 0,4659 | <0,01         | 0,3198 | 0,6788 | 7         | 33,33% | 43        | 55,84% | 33        | 44,00% |
| <b>BAPS 3</b> | 155                   | 22,08% | 1,1090          | 0,487 | 0,8284 | 1,4847                    | 34         | 17,62%          | 1,0414 | 0,856  | 0,6721 | 1,6136 | 69              | 28,51% | 1,3912 | 0,058         | 0,9885 | 1,9580 | 4         | 19,05% | 2         | 2,60%  | 6         | 8,00%  |
| <b>BAPS 4</b> | 3                     | 0,43%  | ND              |       |        |                           | 0          | 0,00%           | ND     |        |        |        | 1               | 0,41%  | ND     |               |        |        | 0         | 0,00%  | 1         | 1,30%  | 0         | 0,00%  |
| <b>BAPS 5</b> | 22                    | 3,13%  | 0,9051          | 0,755 | 0,4833 | 1,6949                    | 4          | 2,07%           | ND     |        |        |        | 15              | 6,20%  | ND     |               |        |        | 0         | 0,00%  | 0         | 0,00%  | 1         | 1,33%  |
| <b>TOTAL</b>  | <b>702</b>            |        |                 |       |        |                           | <b>193</b> |                 |        |        |        |        | <b>242</b>      |        |        |               |        |        | <b>21</b> |        | <b>77</b> |        | <b>75</b> |        |

<sup>a</sup>using BAPS 1 as a reference group
